# Supplementary material for: Complementary Role of P2 and Adenosine Receptors in ATP Induced-Anti-Apoptotic Effects Against Hypoxic Injury of HUVECs
Source: MDPI journal article supplement (doi:10.3390/ijms20061446), 2019-03-22
Supplement: s1 [file s1]

Supplemental file 4: Forward and reverse oligonucleotide primers for RT-PCR analysis.

| Oligo name      | Oligo name       | Sequence                        |
|-----------------|------------------|---------------------------------|
| <i>EEF2</i>     | sense primer     | GGC-CCT-CTT-ATG-ATG-TAT-ATT-TCC |
|                 | antisense primer | CTG-ACC-TTC-AGG-CCA-GT          |
| <i>NT5E</i>     | sense primer     | GGA-TAC-ACT-TCC-AAA-GAA-ACC-C   |
|                 | antisense primer | ATC-TAC-TTC-AGG-TTG-TAA-TGC-AG  |
| <i>ENTPD1</i>   | sense primer     | CTA-TCA-ACT-ATC-TGC-TGG-GCA-A   |
|                 | antisense primer | GCT-CCA-AAG-GTT-TCC-TGA-TTA-T   |
| <i>P2Y1</i>     | sense primer     | CGT-GCT-GGT-GTG-GCT-CAT-T       |
|                 | antisense primer | GGA-CCC-CGG-TAC-CTG-AGT-AGA     |
| <i>P2Y2</i>     | sense primer     | CGA-GGA-CTT-CAA-GTA-CGT-GCT-G   |
|                 | antisense primer | GTG-GAC-GCA-TTC-CAG-GTC-TTG-A   |
| <i>P2Y4</i>     | sense primer     | TGT-CCT-TTT-CCT-CAC-CTG-CAT     |
|                 | antisense primer | TGC-CCG-AAG-TGG-GTG-G           |
| <i>P2Y6</i>     | sense primer     | CCT-GCC-CAC-AGC-CAT-CTT         |
|                 | antisense primer | GGC-TGA-GGT-CAT-AGC-AGA-CAG-TG  |
| <i>P2Y11</i>    | sense primer     | GTT-GGT-GGC-CAG-TGG-TGT-G       |
|                 | antisense primer | TTG-AGC-ACC-CGC-ATG-ATG-T       |
| <i>P2X1</i>     | sense primer     | TCT-CTC-CCC-AGG-CTT-CAA-CTT     |
|                 | antisense primer | GAG-GTG-ACG-GTA-GTT-GGT-CCC     |
| <i>P2X4</i>     | sense primer     | CAT-CAT-CCC-CAC-TAT-GAT-CAA-CA  |
|                 | antisense primer | AGC-ACG-GTC-GCC-ATG-C           |
| <i>P2X7</i>     | sense primer     | ATC-GGC-TCA-ACC-CTC-TCC-TAC     |
|                 | antisense primer | CTG-GAG-TAA-GTG-TCG-ATG-AGG-AAG |
| <i>CASPASE3</i> | sense primer     | TGT-GAG-GCG-GTT-GTG-GAA-GAG-T   |
|                 | antisense primer | AAT-GGG-GGA-AGA-GGC-AGG-TGC-A   |
