# Supplementary material for: Complementary Role of P2 and Adenosine Receptors in ATP Induced-Anti-Apoptotic Effects Against Hypoxic Injury of HUVECs
Source: MDPI journal article supplement (doi:10.3390/ijms20061446), 2019-03-22
Supplement: s1 [file s1]

Supplemental file 5: Primary and secondary antibodies for immunoblotting analysis.

| Proteins              | Primary antibody                                                                      | Secondary antibody                                                    |
|-----------------------|---------------------------------------------------------------------------------------|-----------------------------------------------------------------------|
| Cleaved caspase 3     | Anti-Cleaved Caspase-3 (Asp175) (5A1E) Rabbit mAb (Cell signaling #9664) - 1:1000     | Goat anti-rabbit, HRP-linked antibody (Cell signaling #7074) – 1:3000 |
| $\beta$ -Actin        | Anti- $\beta$ -Actin Mouse mAb (Sigma-aldrich #A1978) – 1:4000                        | Goat anti-mouse, HRP-linked antibody (Abcam #ab97023) – 1:4000        |
| GSK-3 $\beta$         | Anti-GSK-3 $\beta$ (27C10) Rabbit mAb (Cell signaling #9315) – 1:1000                 | Goat anti-rabbit, HRP-linked antibody (Cell signaling #7074) – 1:3000 |
| Phospho-GSK-3 $\beta$ | Anti-Phospho-GSK-3 $\beta$ (Ser9) (D2Y9Y) Mouse mAb (Cell signaling #14630) – 1 :1000 | Goat anti-mouse, HRP-linked antibody (Abcam #ab97023) – 1:4000        |
